# Supplementary material
Source: PubMed Central journal article supplement (PMC2719040)
Supplement: 2008.002808_1.pdf [file 2008.002808_1.pdf]

---

# Heterogeneous breakpoints in patients with acute lymphoblastic leukemia and the dic(9;20)(p11~13;q11) show recurrent involvement of genes at 20q11.21

Qian An,<sup>1,2</sup> Sarah L. Wright,<sup>2</sup> Anthony V. Moorman,<sup>2,3</sup> Helen Parker,<sup>1,2</sup> Mike Griffiths,<sup>4</sup> Fiona M. Ross,<sup>5</sup> Teresa Davies,<sup>6</sup> Christine J. Harrison,<sup>2,3</sup> and Jon C. Strefford<sup>1,2</sup>

<sup>1</sup>Cancer Genomics Group, Cancer Sciences Division, University of Southampton; <sup>2</sup>Previous address: Leukaemia Research Cytogenetics Group, Cancer Sciences Division, University of Southampton; <sup>3</sup>Northern Institute for Cancer Research, University of Newcastle, Newcastle upon Tyne; <sup>4</sup>West Midlands Regional Genetics Laboratory, Birmingham Women's Hospital, Birmingham; <sup>5</sup>Wessex Regional Genetics Laboratory, Salisbury District Hospital, Salisbury, and <sup>6</sup>Bristol Genetics Laboratory, Southmead Hospital, Westbury-on-Trym, Bristol, UK

*Citation: An Q, Wright SL, Moorman AV, Parker H, Griffiths M, Ross FM, Davies T, Harrison CJ, and Strefford CJ. Heterogeneous breakpoints in patients with acute lymphoblastic leukemia and the dic(9;20)(p11~13;q11) show recurrent involvement of genes at 20q11.21. Haematologica 2009. doi: 10.3324/haematol.2008.002808*

---

[Online supplementary Tables 1-4](#). Refer to the corresponding \_PDFs [An\\_SUPPL TABLE 1.pdf](#), [An\\_SUPPL TABLE 2.pdf](#), [An\\_SUPPL TABLE 3.pdf](#), and [An\\_SUPPL TABLE 4.pdf](#).





**Supplementary table 3 Restriction enzymes and primers for LDI-PCR**

| <b>Patient ID</b> | <b>Restriction enzyme</b> | <b>1<sup>st</sup>-Forward</b> | <b>2<sup>nd</sup>-Forward</b> | <b>Reverse</b>       |
|-------------------|---------------------------|-------------------------------|-------------------------------|----------------------|
| 4451              | <i>TaqI</i>               | ACTTACCTTACCTGCTGG            | CTCTCTCAAGCCAGGAAG            | TGGGAATGTAGACCCAAG   |
| 5618              | <i>PstI / SphI</i>        | TGTGAGGAGGAGACAGAG            | AGCGGAAATACCCACAAAG           | CTGTCCTCTCTGGCAGG    |
| 7550              | <i>NcoI / BslI</i>        | GCACTTGCAGTCTTGAGTG           | GGTGACGTCTGAGAGTGG            | ATCTGACATTCTATAGACCC |
| 6897              | <i>SphI / SpeI</i>        | TTCTGCCTGGATACTCAG            | TTCCAGACCATTGGAG              | CCAGAGTTAGTTTCTCCG   |
| 7063              | <i>ScaI</i>               | GTGTCCTTTCTTCAAGG             | TTCTGGCTCCTTAGAATG            | TTGTAGGCTGTTGGCTAG   |
| 8901              | <i>SacI</i>               | TGAGGCAAGCAACACCATG           | GCTGTGATTACTGGTGTGAG          | GTGACAGAGTGAGACCCTG  |

**Supplementary table 2 Primer sequences of MCC markers on 9p13**

| Marker<br>(gene/region) | External forward      | Internal forward     | Common reverse       |
|-------------------------|-----------------------|----------------------|----------------------|
| 1 (PAX5)                | GATCTGTTTCAGGACATGG   | CATCTCCAGGCAGCTTCG   | CTATGATACTGTCATATTGG |
| 2 (PAX5)                | GAGACAGGAAGCATCAAG    | CACCATGTTTGCCTGGG    | CAGGAAAGGCACATGCAG   |
| 3 (PAX5)                | CTCAGCTCGAACCATGG     | CTCTTCTCCTTCCTGATGG  | CTTACCTATGCTGTGACTGG |
| 4 (PAX5)                | CTCGTGGCTCAGGTGTGG    | CCTCACGTGCGGTGACAG   | CTGATGGAGTACGACGAG   |
| 5 (PAX5)                | GACTAACTCAGCTTGGTGG   | CAGAGTATTCAGCCATGG   | CTCACCTGTCACAATGGG   |
| 6 (PAX5)                | GTGAGAGCGTGTGAGCG     | GTTGCTTTGATTCTCAGG   | CAGTGCAAACCTACCAGG   |
| 7 (PAX5)                | CACTCCATAATGATGTGG    | GAAGTGGATTTGACGTTTGG | GGAACCTCCAGGAGTCG    |
| 8 (PAX5)                | CACAGCATAGGTAAGAGG    | CAGCACACGTAATAATGCG  | CAATTTTCTGTCTCATGGTG |
| 9 (PAX5)                | GCACTTGCAGTCTTGAGTG   | GGTGACGTCTGAGAGTGG   | GTTTCTGTATCCCAAGTGG  |
| 10 (PAX5)               | GAATGGGCAGAGTCCTGG    | CTGATCCTCCATGGTTGG   | GTCTTCCCTTTCTTATAGG  |
| 11 (PAX5)               | GAAGAATAATTCTACTGTAGG | GTTCAAAAACCTACCGAGG  | CAGAGCCCATGACATTCG   |
| 12 (PAX5)               | CTGAAATGTGAGAAGAAAGG  | CTACTCTTAAGAGTCAAAGG | GCTGAATTGCCATTTCTGG  |
| 13 (PAX5)               | GATAAATAATAGCACTCTGG  | CGAAGCAGATTAGTTATAGG | GAAGTCGAGGTTGTAGTG   |
| 14 (PAX5)               | GCCTCTTATTAGCTGTATG   | GATAATGCCTCAATGCCTGG | CAAACCTCAAACCGCAGAG  |
| 15 (PAX5)               | GTGCAGTGGCATGATCTG    | CGGAGTTTACCATCTTG    | GGAAAGAATTCATAATAAAG |
| 16 (PAX5)               | CGCAACATCCATCAATAGG   | GTGTCTAAGATACTTTGAAG | CACACGCACATGCATCTG   |
| 17 (PAX5)               | CGAATGAATGAATGACATGC  | GGAAAGCATAGAGGTCCG   | CAACTGAGAACAGCTTTGG  |
| 18 (PAX5)               | GGACACACAAATTCCTTGG   | CTCTTGTGGTTACATTGGG  | TCCTAATTCACAGAACCTG  |
| 19 (PAX5)               | AGATCCTCCTACCATCTTG   | ACAGAGCATCACCATTAGG  | TGAGGAAATGGCGTATCAG  |
| 20 (PAX5)               | TAGAAGTGAGGTTCACTGG   | TCCCTGATTCCACAGCG    | TCAGTCTGAGCTTCCTCG   |
| 21 (PAX5)               | ATCCTTTAGAGCACTCAGG   | CTCCTGTCTCTGGAGCAG   | CGGAACCAGCAACTGTTG   |
| 22 (PAX5)               | GAGATCCTACCTTCATCG    | TTCAGGTGCTGGTATCAC   | AACAGGGACTTCAATTCAG  |
| 23 (PAX5)               | CTTTGCTCCATTTACACGG   | CACGTACCTGAATGTTTGG  | TAAGTGCACCTCCAGAGG   |
| 24 (PAX5)               | GGTGAAGGACTTAGCTGG    | TGTGAGGAGGAGACAGAG   | GTCTTTGTGGGTATTTCCG  |
| 25 (PAX5)               | TCACAGCTTCTGGCAAGG    | TGGGCTCTGTCCAGAG     | AGACTCCACCACCTTCTG   |
| 26 (PAX5)               | GTCTACATTCCTCAAGTGG   | ACTTACCTTACCTGCTGG   | CTTCTGCTTGTGAGAGAG   |
| 27 (PAX5)               | TCTGCTAATGGTCTCATAG   | GCTTGTCTTGTGGTCAG    | CATGAAGGAGGAGTTCAG   |
| 28 (PAX5)               | TCAGGATGTACACATACAG   | CTTCCACCCTGTCTGATG   | CCTGTTACCTCTGTCTG    |
| 29 (PAX5 3' region)     | AGCATCAGATGCCATCAG    | GCACATGTGGACACCAG    | TGAGAGTTCGCCACAG     |
| 30 (PAX5 3' region)     | TCCTTGCTCTCACCTG      | CTACCACATTTAGCCTCG   | GTGATGCTGACACGTGG    |
| 31 (PAX5 3' region)     | TCTGCATGAGGTCCCAG     | AACACATCAGTTGCTCCG   | ATGTAGTCCCTGCCCTG    |
| 32 (PAX5 3' region)     | GACCCACTGTCCTCAAG     | AGCACTGGACTCAGGAG    | TGGTTTCACTGGAAGG     |
| 33 (PAX5 3' region)     | TAGGAGTCAGGGCATGG     | TTGGCTGATAACAAGAAGG  | CTCACCATGAAACAGGG    |
| 34 (PAX5 3' region)     | GTGGTGACACAGTGCAG     | GATACATACATGCCTGTG   | GGGTTAGCGGTTATAATG   |
| 35 (PAX5 3' region)     | ATGATGGCCAAGGGAGG     | GATGGGACATAAGCACTG   | GGTCGAGGAATTCGAGT    |
| 36 (PAX5 3' region)     | CTCCATTCTTCAAGCAGG    | CAGGAAGAACAGGAACAG   | AGTGTCTCCCTCCATG     |
| 37 (PAX5 3' region)     | ATGGCTGAGGTGGAGAG     | TGTACAGGAAGTACCAG    | CCAGAGTTAGTTTCTCCG   |
| 38 (PAX5 3' region)     | ACTTGGTGACAGGGTAG     | TGTTTGAATGCCACTGG    | ACAGTGTAAGGGGCGTG    |
| 39 (ZCCHC7)             | TTGATTGAGCCAGGCAG     | CCTATTGGTGGGTTCTG    | CATGCCTAGACTGAGAG    |
| 40 (ZCCHC7)             | TCAGGGTCAGAGAGGTG     | GGGTAGCATCGTTACAG    | ACATCAAGATGCCAAGG    |
| 41 (ZCCHC7)             | TCATTAATAACAGCTGAG    | GATTTCCCTTTATTTCTG   | AGCCAACCTCACCATAAG   |
| 42 (ZCCHC7)             | TTACGAAGAAGTGGCAGG    | GGTTTGAATCTCATCTGG   | TCACCTGGAGCTCTCTAG   |
| 43 (ZCCHC7)             | ATCTGATAACCCAGATGG    | GACTACAGCTGACTACG    | TCAAATGCTCAGTGTGG    |
| 44 (ZCCHC7)             | TTCTGGCTCCTTAGAATG    | ATGAAACGGGAAGTACTG   | CTCTCTTGGACAGTAAATG  |

**Supplementary table 1** FISH mapping clones on chromosomes 9 and 20

| <b>Probe</b> | <b>Location</b> | <b>Start bp</b>  | <b>End bp</b> |
|--------------|-----------------|------------------|---------------|
| RP11-12P15   | 9p13.2          | N/A <sup>a</sup> | N/A           |
| RP11-8N6     | 9p13.2          | 36632473         | 36774305      |
| RP11-344B23  | 9p13.2          | 36772306         | 36897415      |
| RP11-297B17  | 9p13.2          | 36895416         | 37054511      |
| RP11-220I1   | 9p13.2          | 37065972         | 37242474      |
| RP11-558N17  | 9p13.2          | 37240475         | 37265639      |
| RP11-397D12  | 9p13.2          | 37263640         | 37455975      |
| RP11-405L18  | 9p13.2          | 37453976         | 37496328      |
| RP11-263I4   | 9p13.2          | 37687305         | 37747914      |
| RP11-3J10    | 9p13.2          | 37745915         | 37935185      |
| RP11-38IH12  | 9p13.2          | 37979359         | 38144215      |
| RP11-310F24  | 9p13.2          | 38142216         | 38263088      |
| RP11-113O24  | 9p13.2          | 38261089         | 38427295      |
| RP11-290L7   | 9p13.1          | 38981975         | 39177642      |
| RP11-74L19   | 9p13.1          | 39485727         | 39638349      |
| RP11-292B8   | 9p13.1          | 40205118         | 40384950      |
| RP11-395E19  | 9p13.1          | 40645668         | 40774565      |
| RP11-144A16  | 9p13.1          | 41332841         | 41507206      |
| RP11-104G3   | 9p12            | 41753918         | 41917754      |
| RP11-366N18  | 9p12            | 42881514         | 43065826      |
| RP11-157L3   | 9p11.2          | 44586810         | 44769175      |
| RP11-327I22  | 9p11.2          | 45063785         | 45244282      |
| RP11-146D12  | 9p11.2          | 45528434         | 45634362      |
| RP11-15E1    | 9p11.2          | 45632363         | 45798788      |
| RP11-21H4    | 9q12            | 64594618         | 64767717      |
| RP11-391M20  | 9q12            | 66812701         | 66987465      |
| RP11-88I18   | 9q13            | 68236014         | 68360401      |
| RP11-415N7   | 9q21.11         | 69381269         | 69489300      |
| RP4-737E23   | 20p11.21        | 22997409         | 23121240      |
| RP11-384D7   | 20p11.21        | 25234658         | 25364451      |
| RP4-694B14   | 20p11.21        | 25522225         | 25650091      |
| RP11-108H13  | 20p10           | 26181749         | 26267569      |
| RP4-610C12   | 20q10           | 28033231         | 28197751      |
| RP11-348I14  | 20q10           | 28197652         | 28267569      |
| RP5-854E16   | 20q11.21        | 29267570         | 29338021      |
| RP5-1018D12  | 20q11.21        | 29337922         | 29436411      |
| RP5-1093G12  | 20q11.21        | 29436312         | 29577966      |
| RP3-324O17   | 20q11.21        | 29577867         | 29657285      |
| RP5-857M17   | 20q11.21        | 29657186         | 29756778      |
| RP5-836N17   | 20q11.21        | 30126905         | 30238598      |
| RP11-392M18  | 20q11.21        | 30238499         | 30383912      |
| RP1-316I5    | 20q11.21        | 30383805         | 30402180      |
| RP11-358N2   | 20q11.21        | 30402081         | 30486790      |
| RP5-1184F4   | 20q11.21        | 30486691         | 30605563      |
| RP11-410N8   | 20q11.21        | 30605464         | 30669072      |
| WI2-250I3    | 20q11.21        | N/A              | N/A           |
| RP11-503P21  | 20q11.21        | 30668973         | 30791658      |
| RP5-1085F17  | 20q11.21        | 30791562         | 30910460      |
| RP4-726C3    | 20q11.21        | 31039788         | 31169289      |
| RP4-733O23   | 20q11.21        | 31169190         | 31184191      |
| RP11-49G10   | 20q11.21        | 31184092         | 31345684      |
| RP5-1187J4   | 20q11.21        | 31345585         | 31505024      |
| RP1-63M2     | 20q11.22        | 31675031         | 31756944      |
| RP4-553F4    | 20q11.22        | 31756845         | 31912314      |

|             |          |          |          |
|-------------|----------|----------|----------|
| RP5-1125A11 | 20q11.22 | 31912215 | 32067781 |
| RPI-64K7    | 20q11.22 | 32067682 | 32207059 |
| RP4-785G19  | 20q11.22 | 32206960 | 32322190 |
| RP3-468O1   | 20q11.22 | 32474325 | 32572156 |
| RP5-914B9   | 20q11.22 | 32572057 | 32595498 |
| RPI1-346K17 | 20q11.22 | 32595391 | 32753365 |
| RP5-1181N3  | 20q11.22 | 32753266 | 32845461 |
| RPI-18C9    | 20q11.22 | 32845362 | 32972116 |
| RP4-756N5   | 20q11.22 | 33031019 | 33154800 |
| RP5-1031J8  | 20q12    | 37826211 | 37981423 |
| RPI-2301I9  | 20q12    | 40304543 | 40448743 |
| RPI-148H17  | 20q13.12 | 45431250 | 45515089 |
| RP4-800J21  | 20q13.32 | 55367451 | 55475907 |

<sup>a</sup> Genomic position data was not available
